# Supplementary material for: CDK1-PDK1-PI3K/Akt signaling pathway regulates embryonic and induced pluripotency
Source: PubMed Central journal article supplement — Cell Death Differ. 2016 Sep 16;24(1):38–48. doi: 10.1038/cdd.2016.84 (PMC5260505; doi:10.1038/cdd.2016.84), 2016-09-16
Supplement: cdd201684x7.pdf [file cdd201684x7.pdf]

## Supplemental table

Table S1: Primers and oligoes for shRNA

| Oligo          | Sequence (5' to 3')<br>F: forward; R: reverse                  |                     |
|----------------|----------------------------------------------------------------|---------------------|
| CDK1           | F: TTTTCAGAGCTTTGGGCACT<br>R: CCATTTTGCCAGAAATTCGT             |                     |
| NANOG          | F: CAAAGGCAAACAACCCACTT<br>R: TCTGCTGGAGGCTGAGGTAT             |                     |
| OCT4           | F: CTCACCCTGGGGTTCTATT<br>R: CTCCAGGTTGCCTCTCACTC              |                     |
| SOX2           | F: GCTGCGAACAGTCAGACAGA<br>R: ACCTCCCGTCCAAGGTAGG              | (HarvardPrimerBank) |
| Endo-LIN28A    | F: GGGGAATCACCTACAACCT<br>R: CTTGGCTCCATGAATCTGGT              |                     |
| LIN28A         | F: AGTAAGCTGCACATGGAAGG<br>R: CCTGTCTCCTTTTGATCTGC             | Tanabe et al., 2013 |
| Endo-OCT4      | F: GACAGGGGGAGGGGAGGAGCTAGG<br>R: CTTCCCTCCAACCAGTTGCCCAAAC    | Tanabe et al., 2013 |
| Endo-SOX2      | F: GGGAAATGGGAGGGGTGCAAAGAGG<br>R: TTG CGTGAGTGTGGATGGGATTGGTG | Tanabe et al., 2013 |
| BRACHYURY      | F: ACCCAGTTCATAGCGGTGAC<br>R: CATTGGGAGTACCCAGGTTG             |                     |
| EMOS           | F: AAACGGACTCAATCCCACTG<br>R: ATTTGCGCCTTTGTTATTGG             |                     |
| GOOSECOID      | F: GCGGAGAAGTGAACAAGAC<br>R: GCGTGTGCAAGAAAGTAGCA              |                     |
| MIXL1          | F: CACTGTGCTCCTGGAAGTGA<br>R: TGAGTCCAGCTTTGAACCAA             |                     |
| GATA4          | F: TCCCTCTCCCTCCTCAAAT<br>R: TTCCCCTAACCAGATTGTCG              |                     |
| PAX6           | F: TGTGTGCTCTGAAGGTCAGG<br>R: CTGGAGCTCTGTTTGAAGG              |                     |
| shRNA-Scramble | CCTAAGGTTAAGTCGCCCTCGC                                         | Addgene             |
| shRNA-CDK1     | GGATGTGCTTATGCAGGATTCCA                                        |                     |
| shRNA-NANOG    | GGTTGCCTCATGTTATTATGC                                          |                     |
| shRNA-OCT4     | TCAAGCAGCGACTATGCACAA                                          |                     |
